# Supplementary material
Source: ML conference proceedings conference paper supplement (https://openaccess.thecvf.com/content/ICCV2023/html/Sanchez_Domain_Generalization_of_ICCV_2023_paper.html)
Supplement: Supplementary file 1 [file Sanchez_Domain_Generalization_of_ICCV_2023_supplemental.pdf]

## A. Implementation details

All results presented in this paper were computed on a GPU Nvidia RTX 3090.

### A.1. State-of-the-art architectures

To compute the inference and for re-training, the following open-source codes were used (all found on github), alongside these associated parameters:

- KPCConv: [HuguesTHOMAS/KPCConv-PyTorch](#). Model: KPFCNN; learning rate 1e-2; number of iterations: 500 000; maximum number of points per batch: 13400. Same parameters for nuScenes and SemanticKITTI. The choice of accumulating the 10 past frames for the accumulated KPCConv comes from the recommendation inside the aforementioned repository.
- Cylinder3D: [xinge008/Cylinder3D](#). Model: cylinder asym; learning rate: 1e-3; number of epochs: 40; batch size: 2; grid size: 480x360x32. Same parameters for nuScenes and SemanticKITTI.
- SRUNet and SPVCNN: [mit-han-lab/spvnas](#). Model: MinkUnet and SPVCNN; learning rate: 2.4e-1; number of epochs: 15 for SemanticKITTI, 20 for nuScenes; batch size: 2 for SemanticKITTI, 8 for nuScenes; voxel size: 0.05m.
- CENet: [huixiancheng/CENet](#). Model: senet-512; learning rate: 1e-2; number of epochs: 100; batch size: 6; Image resolution: 512x64. Only trained on SemanticKITTI.
- Helix4D: [romainloiseau/Helix4D](#). Model: Helix4D; learning rate: 2e-3; number of epochs: 50; batch size: 2. Only trained on SemanticKITTI.

### A.2. 3DLabelProp

As mentioned in the main paper, the KPCConv model used inside 3DLabelProp is the standard layout, namely the KPFCNN. It consists of 4 downsampling blocks and 4 up-sampling blocks.

In every case, the model architecture does not change. For the training, we use a Lovasz loss and weighted cross-entropy loss. We use a SGD optimizer with a weight decay of 1e-4 and a momentum of 0.98. The learning rate scheduler is a cosine annealing scheduler. It is trained with cluster extracted by the 3DLabelProp pipeline when assuming that past inferences are the ground truth. Training hyperparameters are:

- SemanticKITTI - learning rate: 0.005, batch size: 12, number of iterations: 400 000.

- nuScenes - learning rate: 0.001, batch size: 16, number of iterations: 350 000.

Due to the annotation process of nuScenes, only 2 frame per seconds are annotated, contrary to other dataset where 10 frames per seconds are annotated. As we are only using the annotated frames for the training of the nuScenes model, we reproduce the same accumulation pattern at inference time.

In practice, we accumulate only one out of 5 frames when processing other datasets to emulate a 2Hz frame rate. It means that to predict semantic of points in frame  $n$ , we use accumulation of frames  $n, n-5, n-10; n-15; n-20$ .

### A.3. Data augmentation

All data augmentations applied are the same for the various methods. They are also the one used for 3DLabelProp, but it is important to note that in the 3DLabelProp case, these augmentations are applied at the cluster level and not at the scan level.

Here is the list:

- Centering.
- Random rotation around z.
- Random scaling.
- Gaussian noise.
- Flipping around x and around y.

## B. Label mappings

The choice of labels for the different mIoU computations can have a significant impact on the results. We share in [Table 9](#) to [Table 13](#) all the details of the mappings between datasets so that all the results can be easily reproduced and that in the future new generalization methods can be compared with our results.

Some mapping can look unnecessarily coarse. For instance, SemanticKITTI define trucks as "Trucks, vans with a body that is separate from the driver cabin, pickup trucks, as well as their attached trailers.", whereas nuScenes define trucks as "Vehicles primarily designed to haul cargo including pick-ups, lorries, trucks and semi-tractors.", which means that the sub element "van" can belong either to truck or not depending on the dataset. In order to not be sensitive to annotation choices, we have to group car and truck together into a single coarse category, otherwise we could be measuring annotation discrepancies.

This need for coarseness is exacerbated for  $\mathcal{L}_{NS \cap SP}$  which is extremely coarse, and as a result can be considered an easy label set.

| SemanticKITTI                             | $\mathcal{L}_{SK \cap NS}$ | nuScenes                                               |
|-------------------------------------------|----------------------------|--------------------------------------------------------|
| motorcycle<br>motorcyclist                | motorcycle                 | motorcycle                                             |
| bicycle<br>bicyclist                      | bicycle                    | bicycle                                                |
| person                                    | person                     | pedestrian                                             |
| road<br>parking                           | d. ground                  | driveable surface                                      |
| sidewalk                                  | sidewalk                   | sidewalk                                               |
| other ground                              | o. ground                  | other flat                                             |
| building<br>fence<br>pole<br>traffic sign | manmade                    | barrier<br>traffic cone<br>manmade                     |
| vegetation<br>trunk                       | vegetation                 | vegetation                                             |
| car<br>truck<br>other vehicle             | vehicle                    | bus<br>car<br>construction vehicle<br>trailer<br>truck |
| terrain                                   | terrain                    | terrain                                                |

Table 9: Details of the mapping from the original label sets of SemanticKITTI and nuScenes to  $\mathcal{L}_{SK \cap NS}$ .

| SemanticKITTI                                          | $\mathcal{L}_{SK \cap SP}$ | SemanticPOSS                          |
|--------------------------------------------------------|----------------------------|---------------------------------------|
| person                                                 | person                     | person                                |
| bicyclist<br>motorcyclist                              | rider                      | rider                                 |
| bicycle<br>motorcycle                                  | bike                       | bike                                  |
| other vehicle<br>car<br>truck                          | car                        | car                                   |
| road<br>terrain<br>parking<br>sidewalk<br>other ground | ground                     | ground                                |
| trunk                                                  | trunk                      | trunk                                 |
| vegetation                                             | vegetation                 | plants                                |
| traffic sign                                           | traffic sign               | traffic sign                          |
| pole                                                   | pole                       | pole                                  |
| building                                               | building                   | building<br>garbage can<br>cone/stone |
| fence                                                  | fence                      | fence                                 |

Table 10: Details of the mapping from the original label sets of SemanticKITTI and SemanticPOSS to  $\mathcal{L}_{SK \cap SP}$ .

| nuScenes                                               | $\mathcal{L}_{NS \cap SP}$ | SemanticPOSS                                                           |
|--------------------------------------------------------|----------------------------|------------------------------------------------------------------------|
| pedestrian                                             | person                     | person                                                                 |
| bicycle<br>motorcycle                                  | bike                       | rider<br>bike                                                          |
| car<br>bus<br>construction vehicle<br>trailer<br>truck | car                        | car                                                                    |
| driveable surface<br>other flat<br>sidewalk<br>terrain | ground                     | ground                                                                 |
| vegetation                                             | vegetation                 | vegetation<br>plant                                                    |
| barrier<br>manmade<br>traffic cone                     | manmade                    | traffic sign<br>pole<br>garbage can<br>building<br>cone/stone<br>fence |

Table 11: Details of the mapping from the original label sets of nuScenes and SemanticPOSS to  $\mathcal{L}_{NS \cap SP}$ .

| SemanticKITTI                                      | $\mathcal{L}_{SK \cap PS}$ | PandaSet                                                                                                                                           |
|----------------------------------------------------|----------------------------|----------------------------------------------------------------------------------------------------------------------------------------------------|
| bicycle<br>motorcycle<br>bicyclist<br>motorcyclist | 2-wheeled                  | pedicab<br>personal mobility device<br>motorized scooter<br>bicycle<br>motorcycle                                                                  |
| person                                             | pedestrian                 | pedestrian<br>pedestrian w/ objects                                                                                                                |
| road<br>parking                                    | d. ground                  | road<br>road marking<br>driveway                                                                                                                   |
| sidewalk                                           | sidewalk                   | sidewalk                                                                                                                                           |
| other ground<br>terrain                            | o. ground                  | ground                                                                                                                                             |
| building<br>fence<br>pole<br>traffic sign          | manmade                    | pylons<br>road barriers<br>signs<br>cones<br>construction signs<br>construction barriers<br>rolling containers<br>building<br>other static object  |
| vegetation<br>trunk                                | vegetation                 | vegetation                                                                                                                                         |
| car<br>truck<br>other vehicle                      | 4-wheeled                  | pickup truck<br>medium sized<br>truck<br>semi-truck<br>towed object<br>construction vehicle<br>uncommon vehicle<br>emergency vehicle<br>bus<br>car |

Table 12: Details of the mapping from the original label sets of SemanticKITTI and PandaSet to  $\mathcal{L}_{SK \cap PS}$ .

| nuScenes                                               | $\mathcal{L}_{NS \cap PS}$ | PandaSet                                                                                                                                           |
|--------------------------------------------------------|----------------------------|----------------------------------------------------------------------------------------------------------------------------------------------------|
| bicycle<br>motorcycle                                  | 2-wheeled                  | pedicab<br>personal mobility device<br>motorized scooter<br>bicycle<br>motorcycle                                                                  |
| pedestrian                                             | pedestrian                 | pedestrian<br>pedestrian w/ objects                                                                                                                |
| driveable ground                                       | d. ground                  | road<br>road marking<br>driveway                                                                                                                   |
| sidewlak                                               | sidewalk                   | sidewalk                                                                                                                                           |
| other flat<br>terrain                                  | o. ground                  | ground                                                                                                                                             |
| barrier<br>manmade<br>traffic cone                     | manmade                    | pylons<br>road barriers<br>signs<br>cones<br>construction signs<br>construction barriers<br>rolling containers<br>building<br>other static object  |
| vegetation                                             | vegetation                 | vegetation                                                                                                                                         |
| car<br>bus<br>construction vehicle<br>trailer<br>truck | 4-wheeled                  | pickup truck<br>medium sized<br>truck<br>semi-truck<br>towed object<br>construction vehicle<br>uncommon vehicle<br>emergency vehicle<br>bus<br>car |

Table 13: Details of the mapping from the original label sets of nuScenes and PandaSet to  $\mathcal{L}_{NS \cap PS}$ .

### C. Quantitative & Qualitative results

In Table 14 to Table 25, we present the details by class of all semantic segmentation results presented in the main article. They are complementary of Table 4 and Table 5

As mentioned in the main article, Table 19 we see the ability of KPConv to perform well on the Person class (+12% over the second best), which explains KPConv out-ranking every other methods. We could believe that 3DLabelProp has trouble reproducing such a high quality of dynamic objects due to the accumulation process, which leaves trail inside the scan. Nonetheless, we did try a variant of 3DLabelProp by discarding past dynamic object (to remove trails), and we notice a decrease in general performance (especially "mobile" objects like parked cars).

We see the impact of the coarseness of  $\mathcal{L}_{NS \cap SP}$  in Table 25 as all methods are well performing.

In the various result tables, we did not include the number of parameters of the various models, even if it is an important variable in real time semantic segmentation. This choice was made because, from one segmentation paradigm to another, the parameters don't have the same impact.

At the end of this part in Figure 8, we illustrate the 3DLabelProp process.

|                    | Car  | Bicycle | Motorcycle | Truck | Other-vehicle | Person | Bicyclist | Motorcyclist | Road | Parking | sidewalk | Other-ground | building | Fence | Vegetation | Trunk | Terrain | Pole | Traffic-sign | mIoU |
|--------------------|------|---------|------------|-------|---------------|--------|-----------|--------------|------|---------|----------|--------------|----------|-------|------------|-------|---------|------|--------------|------|
| CENet              | 91.3 | 24.8    | 60.6       | 81.8  | 57.1          | 56.9   | 76.5      | 0.0          | 93.2 | 51.6    | 78.7     | 0.1          | 84.6     | 54.9  | 82.9       | 60.1  | 68.6    | 54.6 | 38.1         | 58.8 |
| Helix4D            | 96.0 | 21.2    | 63.5       | 68.2  | 61.4          | 64.9   | 73.9      | 0.5          | 93.3 | 39.4    | 79.2     | 1.4          | 88.6     | 54.1  | 88.5       | 60.7  | 77.4    | 61.2 | 46.0         | 60.0 |
| KPCConv            | 94.7 | 36.8    | 58.6       | 45.1  | 47.7          | 62.7   | 76.8      | 1.0          | 90.1 | 32.3    | 75.5     | 3.8          | 88.4     | 59.8  | 87.6       | 67.2  | 74.3    | 61.7 | 44.4         | 58.3 |
| SRUNet             | 96.2 | 7.9     | 51.6       | 65.5  | 51.5          | 64.7   | 64.5      | 0.0          | 93.2 | 48.3    | 80.1     | 0.1          | 91.0     | 62.3  | 88.4       | 67.7  | 75.4    | 62.8 | 43.3         | 58.6 |
| SPVCNN             | 96.5 | 22.6    | 59.4       | 79.4  | 61.8          | 67.1   | 81.0      | 0.0          | 93.3 | 47.7    | 80.5     | 0.2          | 91.1     | 63.8  | 87.7       | 66.9  | 73.2    | 63.5 | 47.7         | 62.3 |
| Cylinder3D         | 96.4 | 21.0    | 53.2       | 79.1  | 57.4          | 69.2   | 80.5      | 0.0          | 93.2 | 43.8    | 79.4     | 2.6          | 90.4     | 55.7  | 86.0       | 64.4  | 71.6    | 63.5 | 45.8         | 60.7 |
| 3DLabelProp (Ours) | 96.4 | 38.7    | 80.3       | 63.5  | 62.6          | 76.5   | 92.6      | 0.0          | 85.9 | 45.6    | 66.5     | 4.2          | 87.4     | 49.0  | 86.4       | 65.6  | 70.0    | 48.5 | 36.4         | 60.8 |

Table 14: Source-to-source segmentation results for SemanticKITTI on  $\mathcal{L}_{SK}$ .

|                    | Car  | Bicycle | Motorcycle | Truck | Other-vehicle | Person | Bicyclist | Motorcyclist | Road | Parking | sidewalk | Other-ground | building | Fence | Vegetation | Trunk | Terrain | Pole | Traffic-sign | mIoU |
|--------------------|------|---------|------------|-------|---------------|--------|-----------|--------------|------|---------|----------|--------------|----------|-------|------------|-------|---------|------|--------------|------|
| CENet              | 82.7 | 1.8     | 20.8       | 38.2  | 16.4          | 13.1   | 51.2      | 0.0          | 86.7 | 18.5    | 67.4     | 0.2          | 69.7     | 32.6  | 76.3       | 38.4  | 69.9    | 46.5 | 11.7         | 39.1 |
| Helix4D            | 93.6 | 20.3    | 42.1       | 35.0  | 52.7          | 56.1   | 63.4      | 2.7          | 89.6 | 24.9    | 73.4     | 3.3          | 86.3     | 48.4  | 86.8       | 56.3  | 73.7    | 58.2 | 43.5         | 53.2 |
| KPCConv            | 92.4 | 30.6    | 52.6       | 27.4  | 30.1          | 55.5   | 70.5      | 2.0          | 84.4 | 21.6    | 67.2     | 8.4          | 83.7     | 56.9  | 87.3       | 60.1  | 74.1    | 58.6 | 37.8         | 52.7 |
| SRUNet             | 94.0 | 7.3     | 45.1       | 57.0  | 43.9          | 54.8   | 53.6      | 0.0          | 90.7 | 37.1    | 75.5     | 1.4          | 88.9     | 54.9  | 87.6       | 62.8  | 74.1    | 60.1 | 37.2         | 54.0 |
| SPVCNN             | 94.0 | 21.4    | 46.3       | 72.7  | 52.7          | 60.4   | 67.6      | 0.0          | 90.7 | 37.3    | 75.4     | 1.9          | 89.1     | 57.9  | 87.3       | 62.8  | 72.5    | 59.2 | 41.2         | 57.4 |
| Cylinder3D         | 92.7 | 20.8    | 38.4       | 65.2  | 48.7          | 56.5   | 64.5      | 0.0          | 90.4 | 18.6    | 73.1     | 1.4          | 88.0     | 40.6  | 83.4       | 58.1  | 70.2    | 59.3 | 38.8         | 53.1 |
| 3DLabelProp (Ours) | 96.2 | 35.4    | 86.4       | 63.8  | 66.7          | 71.7   | 87.8      | 0.0          | 77.8 | 38.7    | 59.3     | 0.7          | 83.5     | 42.6  | 82.6       | 53.6  | 56.3    | 43.3 | 31.0         | 56.7 |

Table 15: Validation set results on generalization from SemanticKITTI to SemanticKITTI32 on  $\mathcal{L}_{SK}$ .

|                    | 2-wheeled | Pedestrian | D. Ground | Seidewalk | O.Ground | Manmade | Vegetation | 4-Wheeled | mIoU |
|--------------------|-----------|------------|-----------|-----------|----------|---------|------------|-----------|------|
| CENet              | 0.1       | 0.7        | 5.2       | 7.2       | 7.0      | 51.0    | 28.2       | 7.4       | 13.3 |
| Helix4D            | 07.6      | 13.9       | 41.7      | 23.7      | 6.4      | 54.6    | 32.2       | 42.5      | 27.7 |
| KPCConv            | 6.4       | 24.6       | 44.9      | 25.7      | 15.2     | 51.3    | 40.5       | 53.0      | 32.7 |
| SRUNet             | 17.8      | 34.7       | 54.8      | 31.8      | 16.9     | 77.7    | 57.9       | 61.6      | 44.2 |
| SPVCNN             | 11.0      | 23.8       | 51.2      | 33.9      | 17.5     | 77.1    | 53.4       | 53.4      | 40.2 |
| Cylinder3D         | 2.7       | 11.9       | 15.5      | 18.4      | 10.4     | 52.2    | 25.1       | 10.9      | 18.4 |
| 3DLabelProp (Ours) | 33.0      | 69.7       | 52.3      | 37.3      | 16.3     | 83.5    | 68.2       | 87.3      | 56.0 |

Table 16: Validation set results on generalization from SemanticKITTI to Panda64 on the label set  $\mathcal{L}_{SK \cap PS}$ .

|                    | 2-wheeled | Pedestrian | D. Ground | Seidewalk | O.Ground | Manmade | Vegetation | 4-Wheeled | mIoU |
|--------------------|-----------|------------|-----------|-----------|----------|---------|------------|-----------|------|
| CENet              | 0.0       | 0.0        | 4.9       | 1.4       | 2.0      | 11.1    | 21.4       | 3.1       | 4.9  |
| Helix4D            | 3.5       | 4.0        | 24.0      | 5.4       | 4.7      | 28.4    | 20.4       | 23.5      | 14.2 |
| KPCConv            | 10.1      | 14.6       | 13.7      | 7.0       | 13.1     | 20.1    | 42.2       | 48.0      | 21.1 |
| SRUNet             | 5.6       | 12.1       | 29.4      | 7.2       | 7.1      | 41.9    | 42.2       | 32.2      | 22.2 |
| SPVCNN             | 2.0       | 6.7        | 28.7      | 7.6       | 6.1      | 49.9    | 37.5       | 16.9      | 19.4 |
| Cylinder3D         | 0.0       | 1.4        | 1.9       | 4.8       | 8.4      | 20.9    | 13.2       | 1.4       | 6.5  |
| 3DLabelProp (Ours) | 41.9      | 61.8       | 65.2      | 27.0      | 10.1     | 73.9    | 72.6       | 89.5      | 55.2 |

Table 17: Validation set results on generalization from SemanticKITTI to PandaFF on the label set  $\mathcal{L}_{SK \cap PS}$ .

|                    | Person | Rider | Bike | Car  | Ground | Trunk | Vegetation | Traffic-sign | Pole | Building | Fence | mIoU |
|--------------------|--------|-------|------|------|--------|-------|------------|--------------|------|----------|-------|------|
| CENet              | 2.9    | 40.2  | 0.0  | 31.9 | 73.9   | 33.3  | 65.6       | 22.2         | 36.5 | 77.6     | 37.0  | 27.9 |
| Helix4D            | 27.8   | 18.4  | 4.0  | 59.7 | 64.4   | 27.7  | 58.0       | 24.3         | 29.2 | 66.5     | 16.4  | 36.0 |
| KPCConv            | 43.9   | 32.7  | 8.6  | 63.4 | 74.8   | 31.4  | 59.7       | 7.6          | 32.6 | 57.6     | 17.6  | 39.1 |
| SRUNet             | 38.9   | 26.1  | 2.9  | 82.9 | 75.1   | 35.5  | 65.6       | 15.5         | 41.6 | 77.1     | 37.3  | 45.3 |
| SPVCNN             | 44.6   | 18.1  | 4.6  | 83.2 | 75.0   | 36.0  | 65.8       | 18.5         | 41.6 | 75.8     | 36.0  | 45.4 |
| Cylinder3D         | 44.6   | 13.6  | 2.8  | 81.5 | 73.6   | 33.2  | 61.6       | 13.1         | 36.0 | 71.3     | 30.1  | 41.9 |
| 3DLabelProp (Ours) | 71.6   | 43.9  | 3.6  | 89.3 | 73.9   | 33.3  | 65.6       | 22.2         | 36.5 | 77.6     | 37.0  | 50.4 |

Table 18: Validation set results on generalization from SemanticKITTI to SemanticPOSS on the label set  $\mathcal{L}_{SK \cap SP}$ .

|                    | Motorcycle | Bicycle | Person | Road | Sidewalk | O. Ground | Manmade | Vegetation | Car  | Terrain | mIoU |
|--------------------|------------|---------|--------|------|----------|-----------|---------|------------|------|---------|------|
| CENet              | 0.0        | 0.0     | 0.0    | 0.8  | 0.2      | 1.3       | 24.6    | 16.8       | 6.0  | 0.2     | 5.0  |
| Helix4D            | 7.5        | 2.8     | 23.2   | 75.7 | 31.7     | 3.8       | 57.2    | 58.5       | 53.7 | 28.5    | 34.3 |
| KPCConv            | 33.7       | 7.8     | 52.8   | 80.3 | 34.9     | 4.0       | 70.7    | 70.5       | 74.3 | 37.8    | 46.7 |
| SRUNet             | 17.1       | 2.4     | 24.8   | 87.8 | 39.4     | 5.1       | 74.7    | 72.6       | 78.5 | 25.5    | 42.8 |
| SPVCNN             | 35.9       | 3.0     | 27.3   | 88.3 | 39.6     | 6.6       | 75.0    | 72.4       | 78.2 | 24.7    | 45.1 |
| Cylinder3D         | 3.3        | 2.2     | 1.0    | 77.3 | 32.0     | 7.6       | 67.3    | 60.6       | 56.2 | 19.8    | 32.7 |
| 3DLabelProp (Ours) | 27.4       | 8.8     | 40.9   | 79.3 | 38.3     | 5.0       | 69.8    | 69.4       | 72.8 | 32.7    | 44.4 |

Table 19: Validation set results on generalization from SemanticKITTI to nuScenes on the label set  $\mathcal{L}_{SK \cap NS}$ .

|                    | barrier | bicycle | bus  | car  | cnstrctn-vhcl | motorcycle | pedestrian | traffic-cone | trailer | truck | drvbl-grnd | other-flat | sidewalk | terrain | manmade | vegetation | mIoU |
|--------------------|---------|---------|------|------|---------------|------------|------------|--------------|---------|-------|------------|------------|----------|---------|---------|------------|------|
| KPConv             | 66.2    | 17.8    | 72.4 | 87.8 | 26.3          | 67.8       | 69.8       | 51.5         | 25.6    | 73.5  | 93.8       | 53.6       | 66.3     | 71.2    | 83.0    | 82.8       | 63.1 |
| SPVCNN             | 72.6    | 14.0    | 82.9 | 88.7 | 32.2          | 73.4       | 69.9       | 47.8         | 46.1    | 78.3  | 95.0       | 64.4       | 69.4     | 71.8    | 84.6    | 83.4       | 67.2 |
| Cylinder3D         | 71.5    | 29.4    | 84.3 | 86.4 | 40.5          | 70.5       | 72.9       | 54.3         | 57.2    | 79.7  | 96.1       | 65.8       | 71.9     | 71.6    | 86.4    | 85.0       | 70.2 |
| 3DLabelProp (Ours) | 71.8    | 46.9    | 84.1 | 84.5 | 39.7          | 83.1       | 77.0       | 50.4         | 47.9    | 79.7  | 93.1       | 62.5       | 68.5     | 72.9    | 87.7    | 86.3       | 71.0 |

Table 20: Source-to-source segmentation results for nuScenes on  $\mathcal{L}_{NS}$ .

|                    | Motorcycle | Bicycle | Person | Road | Sidewalk | O. Ground | Manmade | Vegetation | Car  | Terrain | mIoU |
|--------------------|------------|---------|--------|------|----------|-----------|---------|------------|------|---------|------|
| KPConv             | 18.9       | 3.9     | 49.8   | 67.2 | 28.8     | 0.4       | 73.4    | 81.8       | 79.0 | 45.8    | 44.9 |
| SPVCNN             | 25.7       | 11.6    | 47.7   | 69.8 | 46.3     | 0.0       | 77.1    | 81.0       | 90.0 | 45.2    | 49.4 |
| Cylinder3D         | 3.7        | 0.0     | 21.0   | 54.3 | 21.5     | 0.0       | 65.0    | 70.9       | 46.1 | 34.4    | 31.7 |
| 3DLabelProp (Ours) | 36.8       | 37.2    | 66.1   | 77.9 | 61.1     | 0.4       | 81.6    | 84.3       | 93.2 | 66.7    | 60.5 |

Table 21: Validation set results on generalization from nuScenes to SemanticKITTI on the label set  $\mathcal{L}_{NS \cap SK}$ .

|                    | Motorcycle | Bicycle | Person | Road | Sidewalk | O. Ground | Manmade | Vegetation | Car  | Terrain | mIoU |
|--------------------|------------|---------|--------|------|----------|-----------|---------|------------|------|---------|------|
| KPConv             | 23.1       | 3.5     | 46.3   | 78.9 | 48.6     | 1.9       | 75.9    | 83.7       | 81.1 | 62.7    | 50.6 |
| SPVCNN             | 28.6       | 8.3     | 45.0   | 81.4 | 50.9     | 0.2       | 81.6    | 84.5       | 91.5 | 60.0    | 53.2 |
| Cylinder3D         | 14.0       | 5.6     | 37.5   | 75.8 | 48.0     | 0.0       | 74.5    | 77.9       | 78.8 | 52.0    | 46.4 |
| 3DLabelProp (Ours) | 45.9       | 39.1    | 63.7   | 83.3 | 63.7     | 0.3       | 81.8    | 85.2       | 93.6 | 68.1    | 62.5 |

Table 22: Validation set results on generalization from nuScenes to SemanticKITTI32 on the label set  $\mathcal{L}_{NS \cap SK}$ .

|                    | 2-wheeled | Pedestrian | D. Ground | Seidewalk | O.Ground | Manmade | Vegetation | 4-Wheeled | mIoU |
|--------------------|-----------|------------|-----------|-----------|----------|---------|------------|-----------|------|
| KPConv             | 3.9       | 6.2        | 20.3      | 17.1      | 10.8     | 64.5    | 53.2       | 24.2      | 25.0 |
| SPVCNN             | 19.2      | 43.1       | 38.0      | 30.6      | 15.3     | 71.9    | 62.1       | 69.4      | 43.6 |
| Cylinder3D         | 0.3       | 0.8        | 13.3      | 6.9       | 7.8      | 58.9    | 30.5       | 8.3       | 15.8 |
| 3DLabelProp (Ours) | 48.9      | 71.5       | 71.9      | 49.8      | 28.6     | 89.2    | 76.9       | 86.1      | 65.4 |

Table 23: Validation set results on generalization from nuScenes to Panda64 on the label set  $\mathcal{L}_{NS \cap PS}$ .

|                    | 2-wheeled | Pedestrian | D. Ground | Seidewalk | O.Ground | Manmade | Vegetation | 4-Wheeled | mIoU |
|--------------------|-----------|------------|-----------|-----------|----------|---------|------------|-----------|------|
| KPConv             | 5.0       | 6.8        | 7.0       | 7.5       | 4.6      | 38.2    | 48.7       | 17.8      | 16.9 |
| SPVCNN             | 1.4       | 7.4        | 3.0       | 3.2       | 8.0      | 28.9    | 28.5       | 8.5       | 11.1 |
| Cylinder3D         | 0.0       | 0.0        | 1.6       | 0.6       | 2.4      | 24.3    | 7.8        | 0.9       | 4.7  |
| 3DLabelProp (Ours) | 51.6      | 68.2       | 90.0      | 40.8      | 28.5     | 85.6    | 81.2       | 87.6      | 66.7 |

Table 24: Validation set results on generalization from nuScenes to PandaFF on the label set  $\mathcal{L}_{NS \cap PS}$ .

|                    | Person | Bike | Car  | Ground | Vegetation | Manmade | mIoU |
|--------------------|--------|------|------|--------|------------|---------|------|
| KPConv             | 56.0   | 17.2 | 72.4 | 73.8   | 70.0       | 74.5    | 60.7 |
| SPVCNN             | 64.5   | 15.5 | 85.6 | 74.2   | 71.8       | 78.1    | 64.8 |
| Cylinder3D         | 22.9   | 0.6  | 29.5 | 74.1   | 63.0       | 66.9    | 42.8 |
| 3DLabelProp (Ours) | 72.1   | 0.9  | 79.4 | 73.3   | 70.8       | 80.9    | 64.3 |

Table 25: Validation set results on generalization from nuScenes to SemanticPOSS on the label set  $\mathcal{L}_{NS \cap SP}$ .

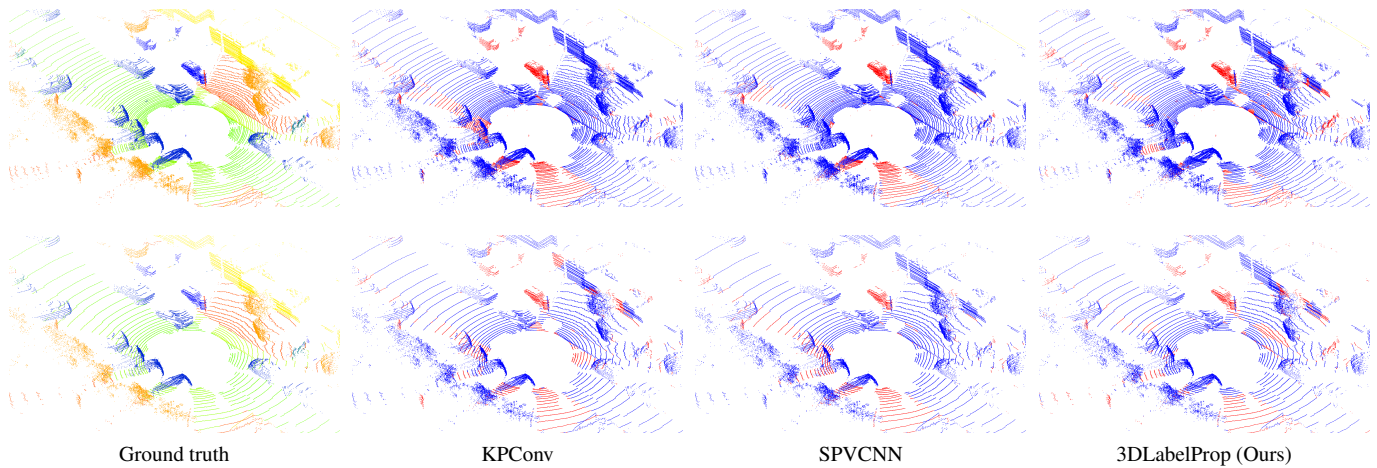

Figure 4: Qualitative results when trained on SemanticKITTI and tested on SemanticKITTI (top row) and SemanticKITTI32 (bottom row). For illustration, the same frame was selected for SemanticKITTI and SemanticKITTI32. From left to right: Ground truth labels, results from KPCnv, results from SPVCNN, results from 3DLabelProp. In blue, points with correct semantic segmentations. In red, errors.

We can observe the decrease in performance from SemanticKITTI to SemanticKITTI32 of SPVCNN on the left sidewalk which is badly labeled for SemanticKITTI32. For KPCnv, the buildings on the right are errors appearing only with SemanticKITTI32. For 3DLabelProp, while the segmentation is slightly worse than SPVCNN on the full resolution, because the decrease of performance is small between SemanticKITTI and SemanticKITTI32, the overall quality for SemanticKITTI32 is on par with SPVCNN.

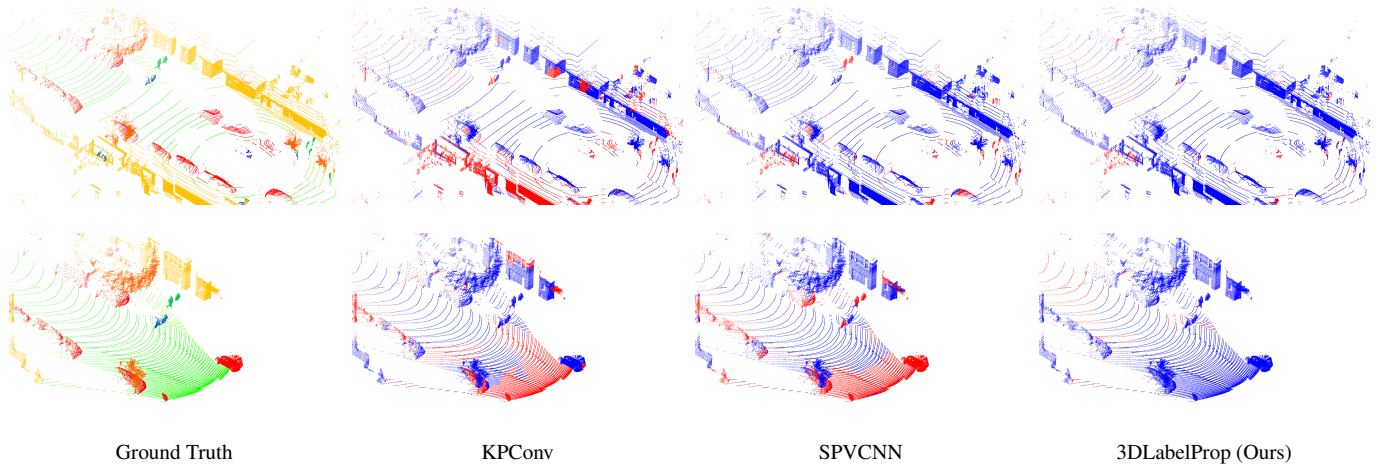

Figure 5: Qualitative results when trained on SemanticKITTI and tested on Panda64 (top row) and PandaFF (bottom row). For comparison in the same environment, two frames acquired at the same time were chosen for Panda64 and PandaFF. From left to right: Ground truth labels, results from KPCnv, results from SPVCNN, results from 3DLabelProp. In blue, points with correct semantic segmentation. In red, errors.

For Panda64 we see the ability of 3DLabelProp to properly segment point close to the sensor contrary to SPVCNN where most of its errors lie. The same pattern can be seen for PandaFF where SPVCNN and KPCnv have a lot of trouble understanding points with limited neighborhoods, i.e points close to the sensor, whereas 3DLabelProp display the same pattern of errors for Panda64 and PandaFF and has no issue with points with limited neighborhoods.

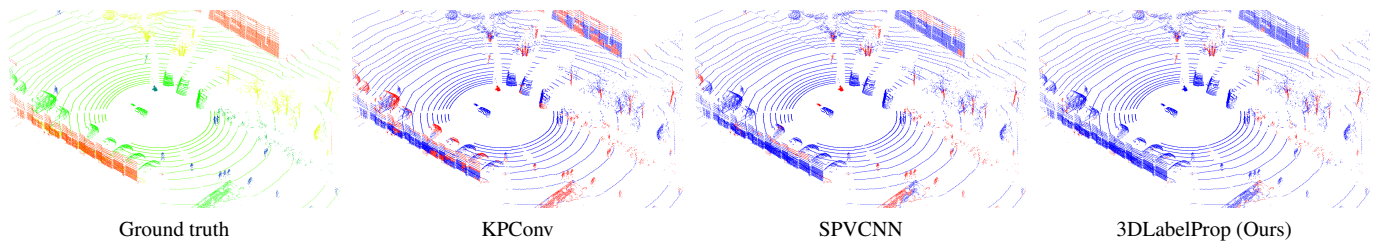

Figure 6: Qualitative results when trained on SemanticKITTI and tested on SemanticPOSS. From left to right: Ground truth labels, results from KPCnv, results from SPVCNN, results from 3DLabelProp. In blue, points with correct semantic segmentation. In red, errors.

In these images, we see the ability of 3DLabelProp to properly recognize all the parked cars, in contrary to KPCnv. Buildings are also more accurately detected for 3DLabelProp compared to SPVCNN. We see that trunks are systematically badly segmented.

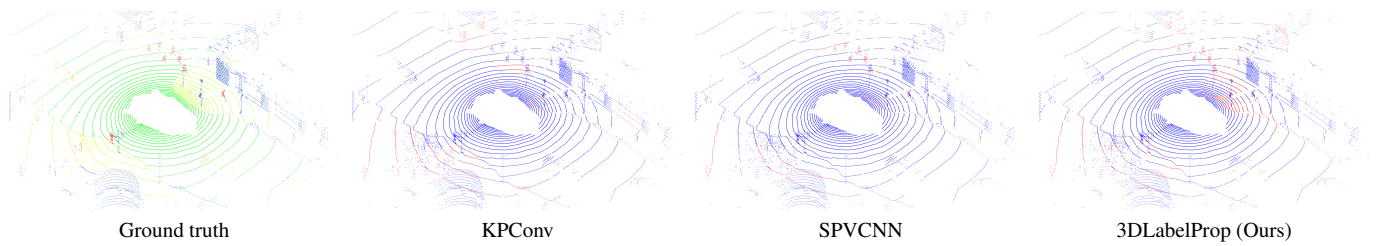

Figure 7: Qualitative results when trained on SemanticKITTI and tested on nuScenes. From left to right: Ground truth labels, results from KPCnv, results from SPVCNN, results from 3DLabelProp. In blue, points with correct semantic segmentation. In red, errors.

We see the higher quality of KPCnv on pedestrians compared to SPVCNN and 3DLabelProp.

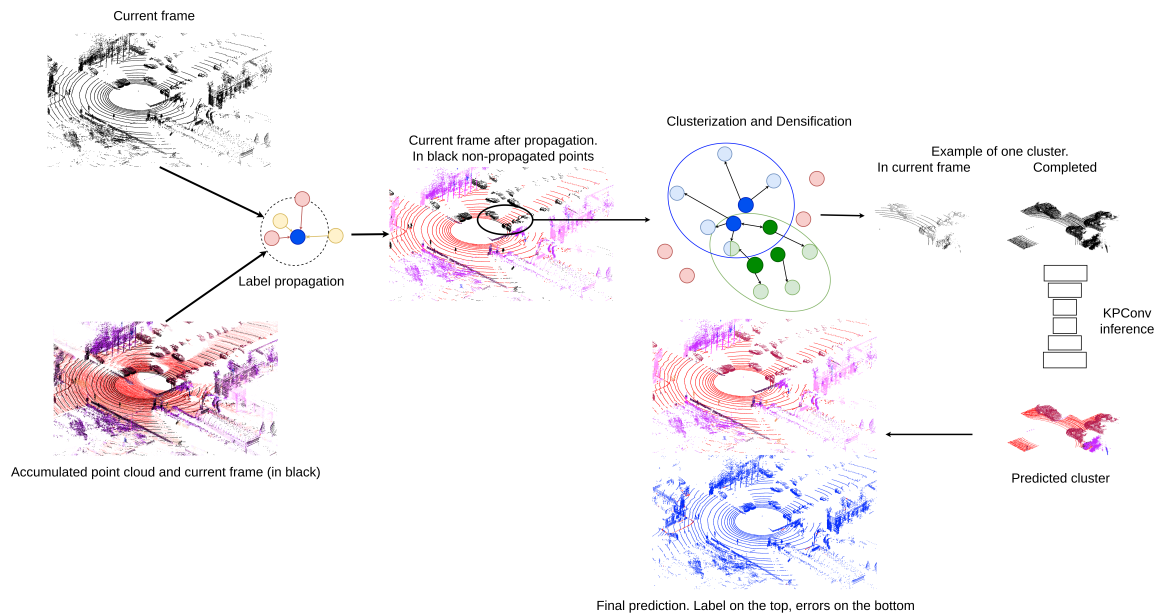

Figure 8: Example of the 3DLabelProp pipeline. Trained on SemanticKITTI and tested on SemanticPOSS.
